# Supplementary material for: Evaluation of pulpal anesthesia and injection pain using IANB with pre-heated, buffered and conventional 2% lignocaine in teeth with symptomatic irreversible pulpitis—a randomized clinical study
Source: PeerJ. 2022 Oct 19;10:e14187. doi: 10.7717/peerj.14187 (PMC9587718; doi:10.7717/peerj.14187)
Supplement: Supplemental Information 1 [file peerj-10-14187-s001.xlsx]

## Sheet: Sheet1
SR. NO	SEX:	AGE:	Tooth Number	Group A/B/C	VAS SCALE		EPT Response		Pain on Injection
1	F	23	46	A	10	1	5	0	0
2	F	28	37	A	6	0	5	0	1
3	F	50	36	A	4	2	6	0	2
4	F	23	44	A	10	1	5	0	0
5	F	59	36	A	8	2	5	9	1
6	F	35	37	A	7	2	3	10	1
7	F	48	36	A	6	2	5	0	1
8	F	36	46	A	10	1	5	0	0
9	F	55	37	A	6	0	5	0	1
10	F	34	44	A	10	1	5	0	0
11	F	59	36	A	8	2	5	9	1
12	F	30	36	A	8	1	6	0	0
13	F	22	36	A	6	0	5	9	2
14	F	59	36	A	8	2	5	9	1
15	F	35	37	A	7	2	7	10	1							0- NO response
16	F	48	36	A	6	2	5	0	1
17	F	52	46	A	8	4	6	0	1
18	F	50	37	A	5	0	7	0	2
19	F	45	36	A	6	2	6	0	2
20	F	48	44	A	7	2	5	0	3
21	F	49	36	A	5	2	6	0	2
22	F	43	37	A	9	2	5	0	1
23	F	19	36	A	7	1	5	0	2
24	F	32	46	A	9	1	5	0	1
25	F	23	37	A	6	1	5	0	1
26	F	25	46	A	9	3	7	0	4
27	F	29	36	A	5	0	5	0	2
28	F	27	37	A	7	2	5	0	3
29	F	28	36	A	8	4	6	0	5
30	F	29	46	A	6	1	5	0	2
31	F	24	36	A	6	1	6	10	1
32	F	35	37	A	7	1	5	0	2
33	F	39	36	A	8	3	5	0	1
34	F	16	46	A	8	2	6	0	1
35	F	35	37	A	7	2	5	0	2
36	F	53	36	A	8	0	5	0	2
37	F	35	36	A	7	1	5	0	1
38	F	40	36	A	8	3	6	0	0
39	M	35	36	A	7	1	6	0	1
40	M	40	36	A	8	3	6	0	0
41	M	35	37	A	7	1	5	0	2
42	M	39	36	A	8	3	5	0	1
43	M	19	46	A	8	2	5	0	1
44	M	35	37	A	7	2	5	0	2
45	M	53	36	A	8	0	5	0	2
46	M	50	38	A	6	1	5	0	0
47	M	42	46	A	6	2	6	6	0
48	M	55	47	A	8	3	5	10	1
49	M	35	36	A	7	1	5	0	1
50	M	40	36	A	8	3	7	0	0
51	M	35	37	A	7	1	5	0	2
52	M	39	36	A	8	3	7	0	1
53	M	19	46	A	8	2	5	0	1
54	M	42	46	A	6	2	6	9	0
55	M	35	37	A	7	2	5	0	2
56	M	53	36	A	8	0	5	0	2
57	M	46	36	A	6	1	2	9	1
58	M	45	36	A	9	3	5	0	4
59	M	42	37	A	8	4	6	0	5
60	M	23	36	A	6	1	5	0	2
61	M	32	46	A	6	1	5	8	2
62	F	32	46	A	9	1	5	0	0
63	F	28	37	A	7	0	5	0	1
64	F	50	36	A	9	2	5	0	2
65	F	23	44	A	6	1	5	0	0
66	F	59	36	A	9	1	5	0	0
67	F	35	37	A	5	0	5	0	1
68	F	48	36	A	7	2	6	0	2
69	F	36	46	A	8	1	5	0	0
70	F	55	37	A	6	2	5	9	1
71	M	34	44	A	6	2	6	8	1
72	M	59	36	A	7	2	5	0	1
73	M	30	36	A	8	4	6	0	1
74	M	21	36	A	8	0	5	0	2
75	M	32	36	A	7	2	6	0	2
76	M	32	37	A	8	2	5	0	3
77	M	56	36	A	7	2	6	0	2
78	M	52	46	A	8	1	5	0	0
79	M	50	37	A	7	0	5	0	1
80	M	45	36	A	8	2	7	0	2
81	M	48	46	A	7	1	5	0	0
82	F	35	36	B	4	1	5	0	4
83	M	36	38	B	6	1	5	0	4
84	M	24	46	B	8	2	5	0	2
85	M	26	47	B	7	0	5	0	2
86	M	45	36	B	7	1	7	9	5
87	M	46	36	B	8	4	7	10	1
88	M	44	46	B	6	2	6	0	2
89	M	52	37	B	6	1	5	9	1
90	F	50	36	B	6	2	7	0	2
91	F	33	37	B	7	2	5	0	3
92	F	40	45	B	8	4	7	0	5
93	F	16	46	B	6	1	5	0	4
94	F	23	46	B	9	2	5	0	1
95	F	43	37	B	8	2	5	0	2
96	F	32	46	B	7	0	5	0	2
97	F	47	37	B	7	2	5	0	3
98	F	33	45	B	8	4	7	0	5
99	F	59	37	B	7	1	5	0	2
100	F	35	36	B	8	3	7	0	1
101	F	48	37	B	6	2	6	9	0
102	F	36	46	B	8	3	7	10	1
103	F	55	36	B			5	0
104	M	23	46	B	8	3	2	0	2
105	M	40	47	B	8	4	7	0	1
106	M	35	36	B	6	1	7	9	1
107	M	32	47	B	9	3	5	0	4
108	M	55	46	B	5	0	5	0	2
109	M	41	46	B	6	2	6	0	2
110	M	35	36	B	6	1	5	0	2
111	M	42	36	B	6	1	5	9	2
112	M	48	36	B	5	2	6	0	2
113	M	52	46	B	6	1	5	9	1
114	M	28	47	B	4	1	5	0	4
115	M	26	36	B	7	1	5	0	2
116	M	30	37	B	9	1	5	0	1
117	M	24	37	B	7	1	7	9	5
118	M	44	47	B	8	4	7	10	1
119	M	44	36	B	6	1	7	0	1
120	M	32	47	B	9	3	7	0	4
121	M	44	46	B	5	0	6	0	2
122	M	39	46	B	6	2	6	0	2
123	M	45	36	B	6	1	5	0	2
124	M	37	37	B	6	1	6	10	1
125	M	23	46	B	8	3	5	0	2
126	M	35	37	B	7	1	5	0	1
127	M	23	46	B	8	3	7	9	1
128	M	48	36	B	8	2	7	0	4
129	M	42	46	B	8	2	5	0	2
130	M	35	37	B	6	2	6	0	2
131	M	30	38	B	8	2	7	0	1
132	M	24	37	B	8	2	5	9	1
133	M	44	36	B	7	2	5	0	2
134	M	44	46	B	8	0	5	0	2
135	M	32	47	B	6	1	5	0	0
136	M	44	46	B	7	2	6	8	1
137	M	39	36	B	8	3	6	0	2
138	M	45	36	B	6	2	5	0	1
139	F	44	46	B	4	1	5	0	4
140	M	41	36	B	6	1	5	0	4
141	M	42	36	B	8	2	5	0	2
142	M	46	36	B	7	0	5	0	2
143	M	45	36	B	7	2	6	8	1
144	M	56	46	B	8	2	5	0	1
145	M	51	47	B	6	4	6	0	1
146	M	52	37	B	6	0	7	0	2
147	M	24	37	B	6	2	6	0	2
148	M	35	46	B	7	2	5	0	3
149	M	36	46	B	8	2	6	0	2
150	F	31	46	B	6	1	5	0	0
151	F	32	46	B	9	2	5	0	1
152	F	19	46	B	8	2	5	0	2
153	F	20	36	B	7	0	5	0	2
154	F	40	36	B	7	0	5	0	1
155	F	60	36	B	8	2	7	0	2
156	F	51	36	B	7	1	5	0	0
157	F	25	36	B	4	1	5	0	4
158	F	24	47	B	6	1	5	0	4
159	F	34	46	C	7	3	5	9	3
160	F	59	36	C	6	2	5	8	3
161	F	30	46	C	6	2	5	0	4
162	F	22	46	C	9	4	5	0	1
163	F	59	36	C	6	3	5	0	2
164	F	35	36	C	9	7	7	0	2
165	F	48	37	C	6	7	5	0	3
166	F	52	47	C	6	9	5	10	3
167	F	32	38	C	9	9	5	0	4
168	F	42	37	C	6	6	5	0	3
169	F	25	36	C	6	6	5	10	3
170	F	31	37	C	8	2	5	0	3
171	F	43	36	C	9	3	5	0	2
172	F	36	37	C	6	3	5	0	3
173	F	49	47	C	6	3	6	9	3
174	F	35	38	C	9	1	6	0	4
175	F	34	37	C	6	2	5	0	3
176	F	38	36	C	6	1	6	9	3
177	F	25	36	C	7	3	5	0	2
178	F	29	37	C	9	2	7	0	3
179	F	27	36	C	6	7	7	0	2
180	F	28	46	C	6	7	5	0	3
181	F	29	37	C	7	9	7	9	3
182	F	24	46	C	6	9	7	0	4
183	F	50	36	C	7	6	5	0	3
184	F	33	44	C	9	3	5	9	5
185	F	40	37	C	6	2	5	0	4
186	F	16	47	C	9	2	6	0	2
187	F	23	36	C	6	4	5	9	4
188	F	43	36	C	7	2	5	0	3
189	F	32	36	C	6	2	6	0	3
190	F	47	36	C	7	7	6	0	2
191	F	33	36	C	7	7	5	0	3
192	F	59	44	C	6	3	6	9	1
193	F	35	37	C	9	2	6	0	4
194	F	28	47	C	6	1	6	0	3
195	M	37	36	C	5	2	6	0	2
196	M	23	46	C	6	4	5	9	4
197	M	35	47	C	4	1	5	0	4
198	M	23	47	C	7	2	7	0	3
199	M	28	47	C	7	6	7	0	3
200	M	44	47	C	7	3	5	9	5
201	M	45	46	C	6	2	5	0	3
202	M	23	37	C	7	2	5	10	1
203	M	38	47	C	7	2	7	0	3
204	M	52	47	C	7	2	7	0	3
205	M	44	47	C	7	3	5	9	5
206	M	44	47	C	5	2	5	0	4
207	M	44	36	C	8	6	7	0	3
208	M	44	36	C	7	6	7	8	3
209	M	32	37	C	9	3	5	9	5
210	M	44	36	C	6	1	6	8	3
211	M	39	36	C	6	3	5	9	3
212	M	45	47	C	7	2	5	8	3
213	M	37	37	C	6	1	5	0	4
214	M	23	46	C	5	1	7	10	3
215	M	35	37	C	7	3	5	9	5
216	M	23	36	C	9	2	5	0	4
217	M	28	46	C	6	3	5	0	2
218	M	44	37	C	7	9	7	10	3
219	M	49	36	C	9	6	7	0	3
220	M	45	36	C	6	2	5	0	2
221	M	31	47	C	7	2	7	0	3
222	M	33	47	C	7	2	7	0	3
223	M	47	47	C	7	3	5	9	5
224	M	45	47	C	5	2	5	0	4
225	M	21	36	C	8	6	7	0	3
226	M	21	36	C	7	6	7	10	3
227	M	32	37	C	9	3	5	9	5
228	M	26	36	C	6	1	7	9	3
229	F	39	36	C	6	3	5	9	3
230	F	45	47	C	7	2	5	9	3
231	F	26	37	C	6	1	5	0	4
232	F	23	46	C	5	1	7	9	3
233	F	28	37	C	7	3	5	9	5
234	F	23	36	C	9	2	5	0	4
235	F	49	46	C	6	3	5	0	2
236	F	44	37	C	7	9	7	9	3
237	F	44	36	C	9	6	7	0	3
238	F	32	37	C	9	3	5	9	5
239	M	26	36	C	6	1	7	10	3
240	M	39	36	C	6	3	5	9	3
241	F	45	47	C	7	2	5	9	3
